# Supplementary material
Source: Research Square preprint supplement (doi:10.21203/rs.3.rs-10317767/v1)
Supplement: Supplementary file 1 [file d677e7f5b7db6f94d1be670c.docx]

Figure S1


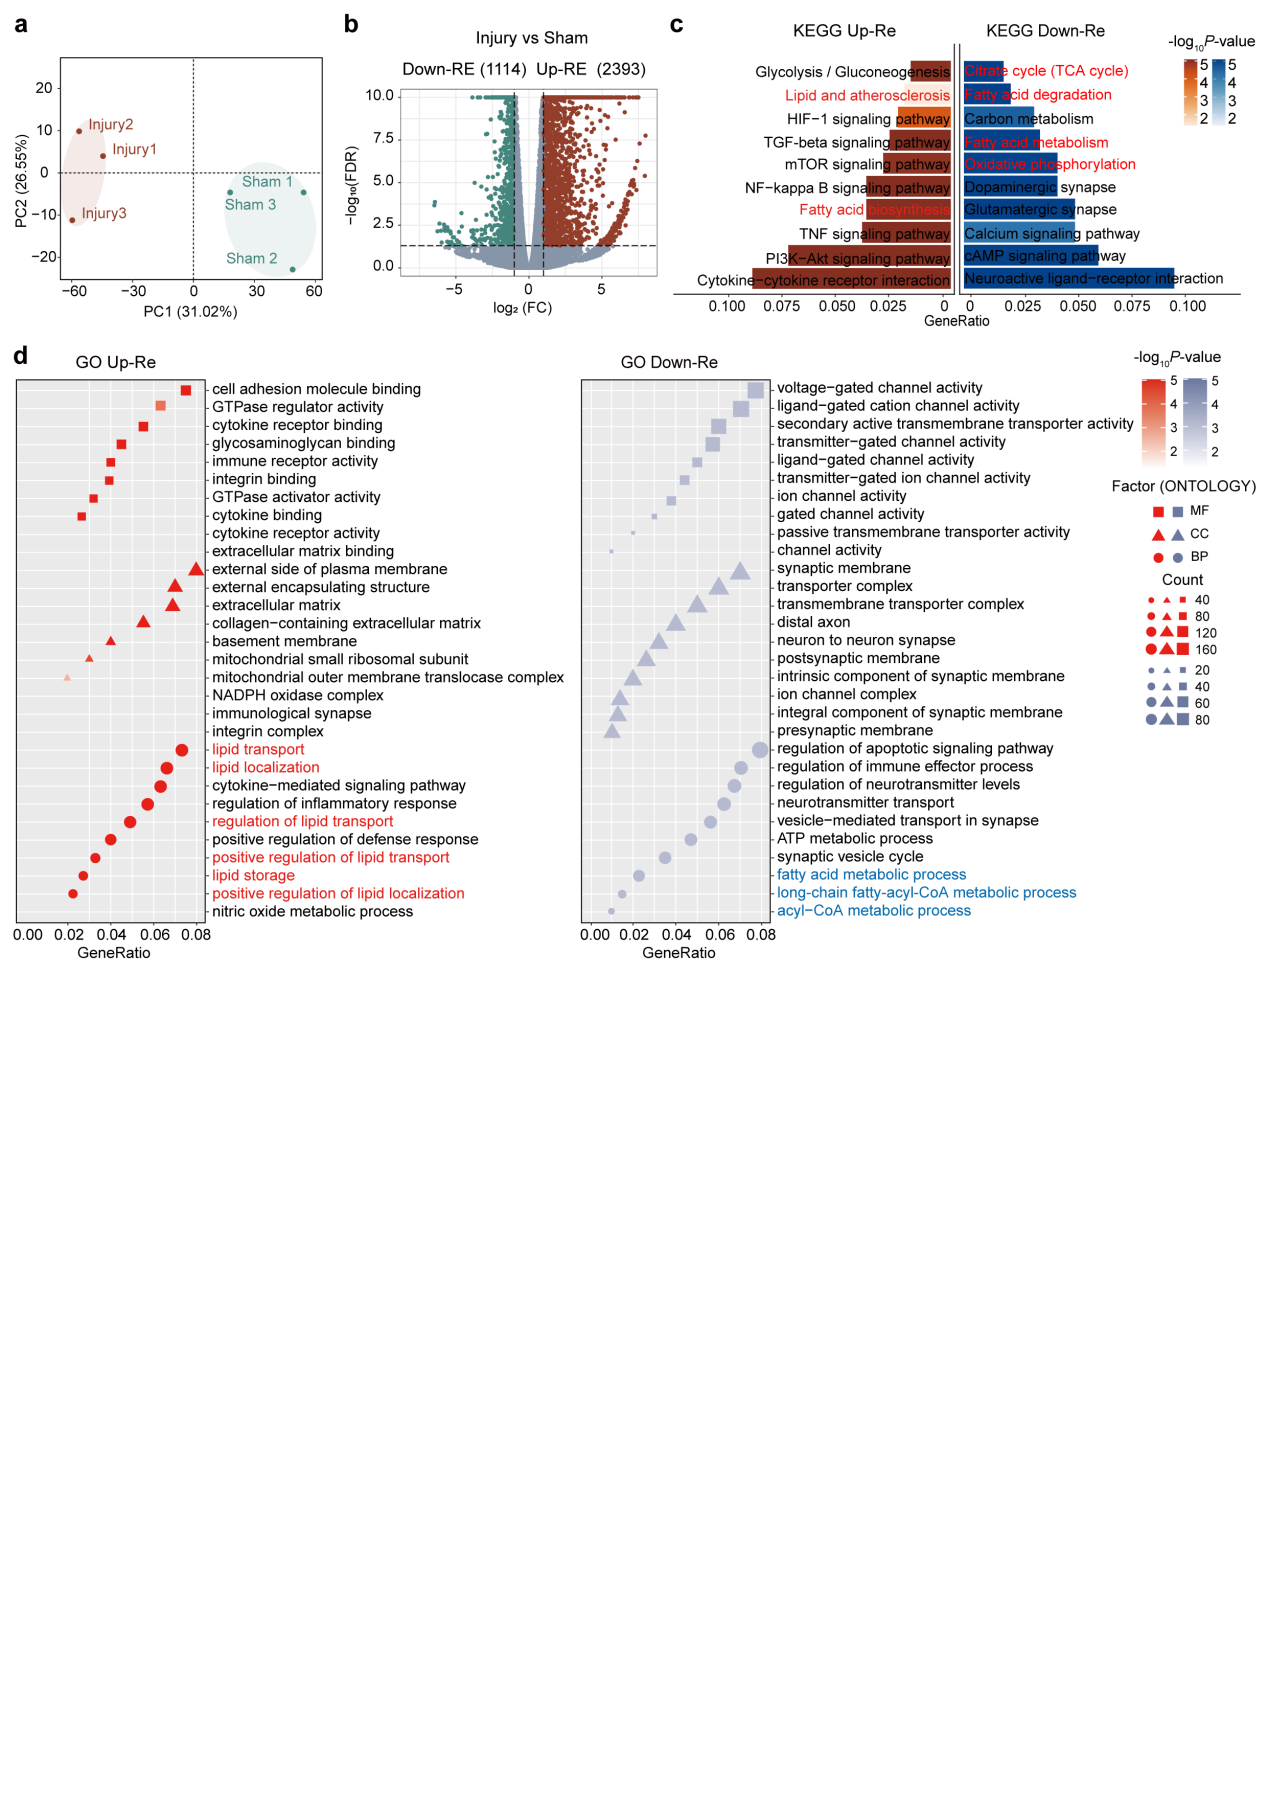


**Figure S1.** Transcriptomic Profiling Reveals Global Metabolic Reprogramming Following Spinal Cord Injury, related to Figure 1

(a) PCA of bulk RNA-seq data from rat spinal cord tissue at 7 days (Injury group vs Sham group).

(b) Volcano plot displaying DEGs between Injury and Sham groups. |log2FC| > 1, FDR < 0.05.

(c) KEGG pathway enrichment analysis of significantly upregulated (Up-Re) and downregulated (Down-Re) genes.

(d) GO enrichment analysis of upregulated (left) and downregulated (right) genes, categorized by molecular function (MF), cellular component (CC), and biological process (BP).

Figure S2


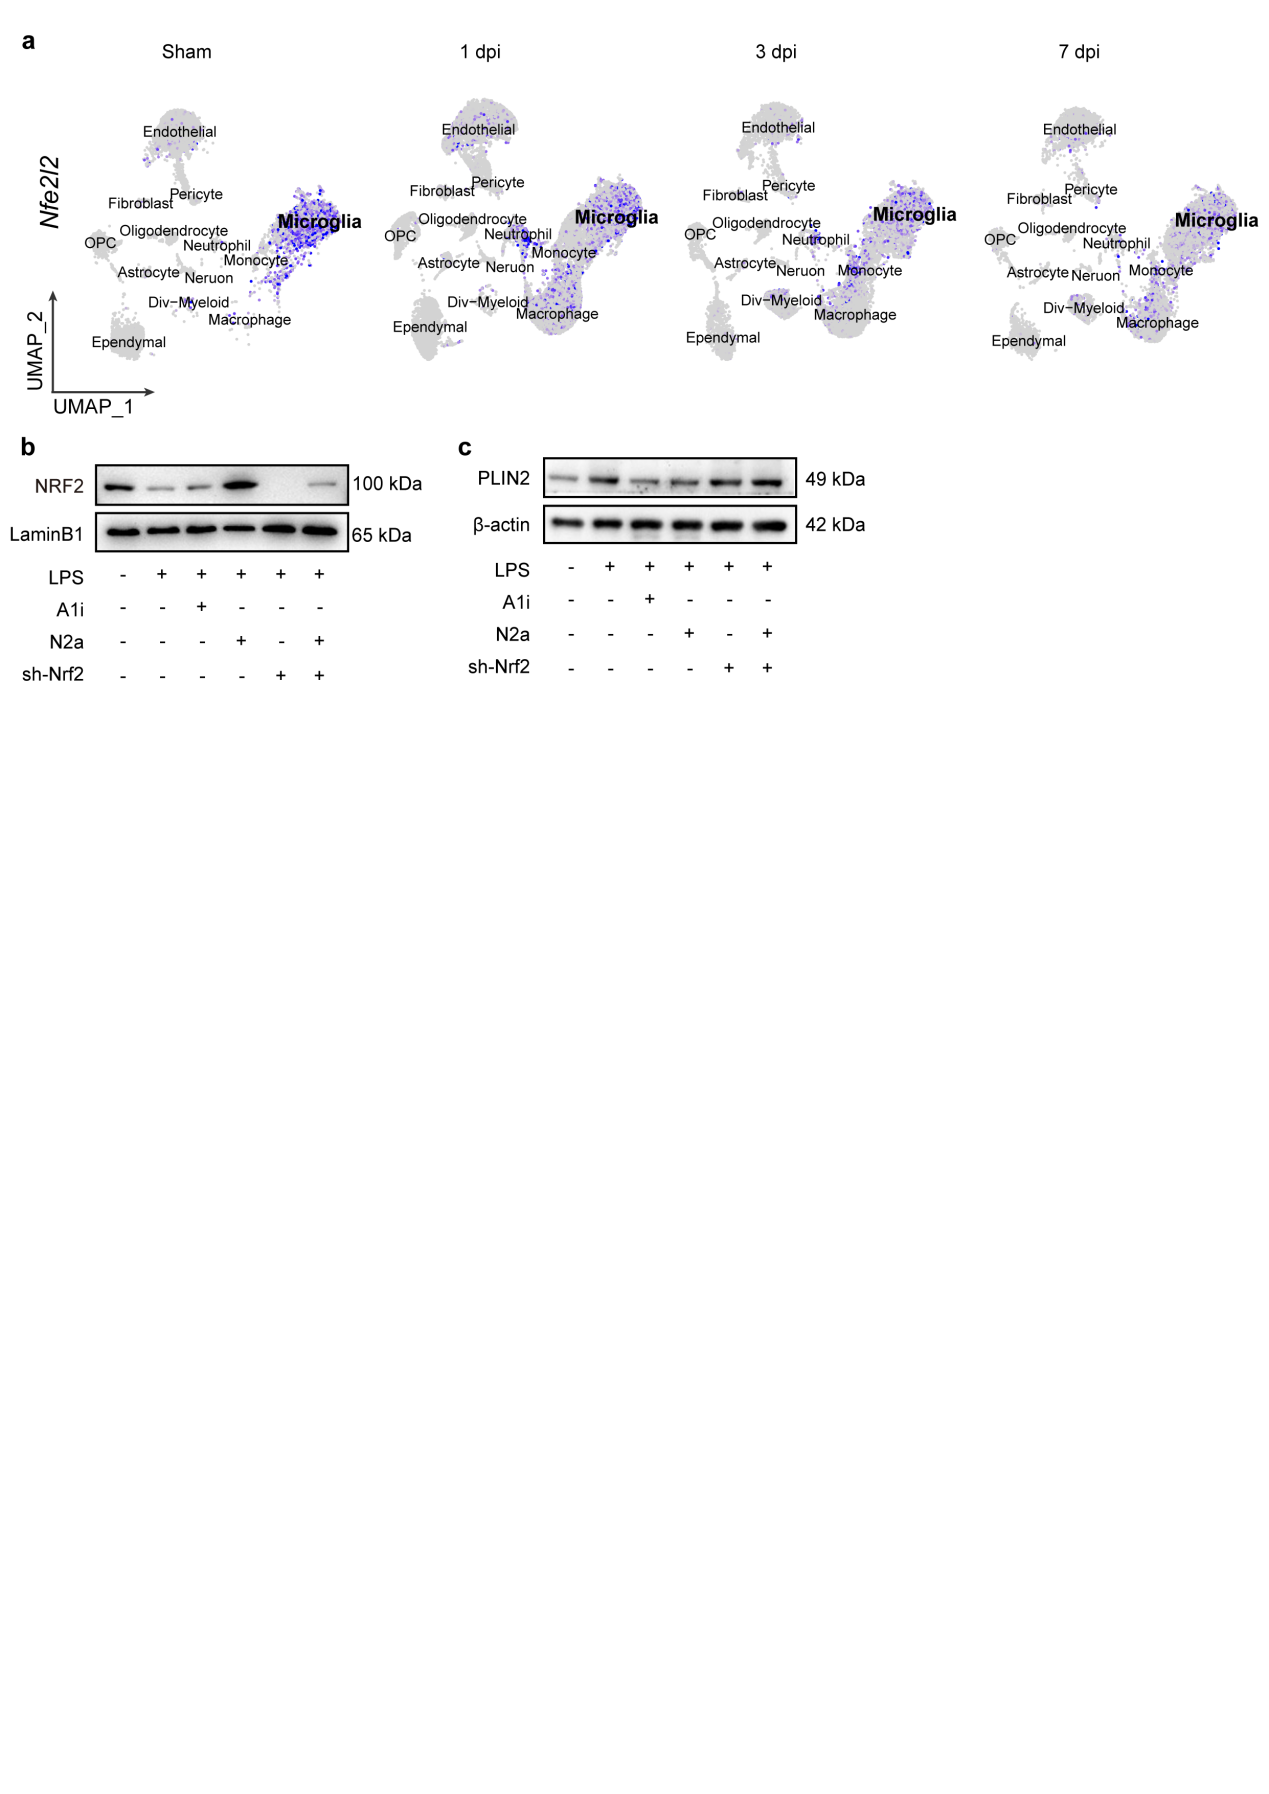


**Figure S2.** *Nfe2l2* Expression in Microglia, related to Figure 3

(a) UMAP visualization of *Nfe2l2* expression across cell types in mouse spinal cord scRNA-seq data at indicated time points post-injury.

(b) Western blotting of NRF2 expression levels in BV2 cells across treatment groups.

(c) Western blotting of PLIN2 expression levels in BV2 cells across treatment groups.

Figure S3


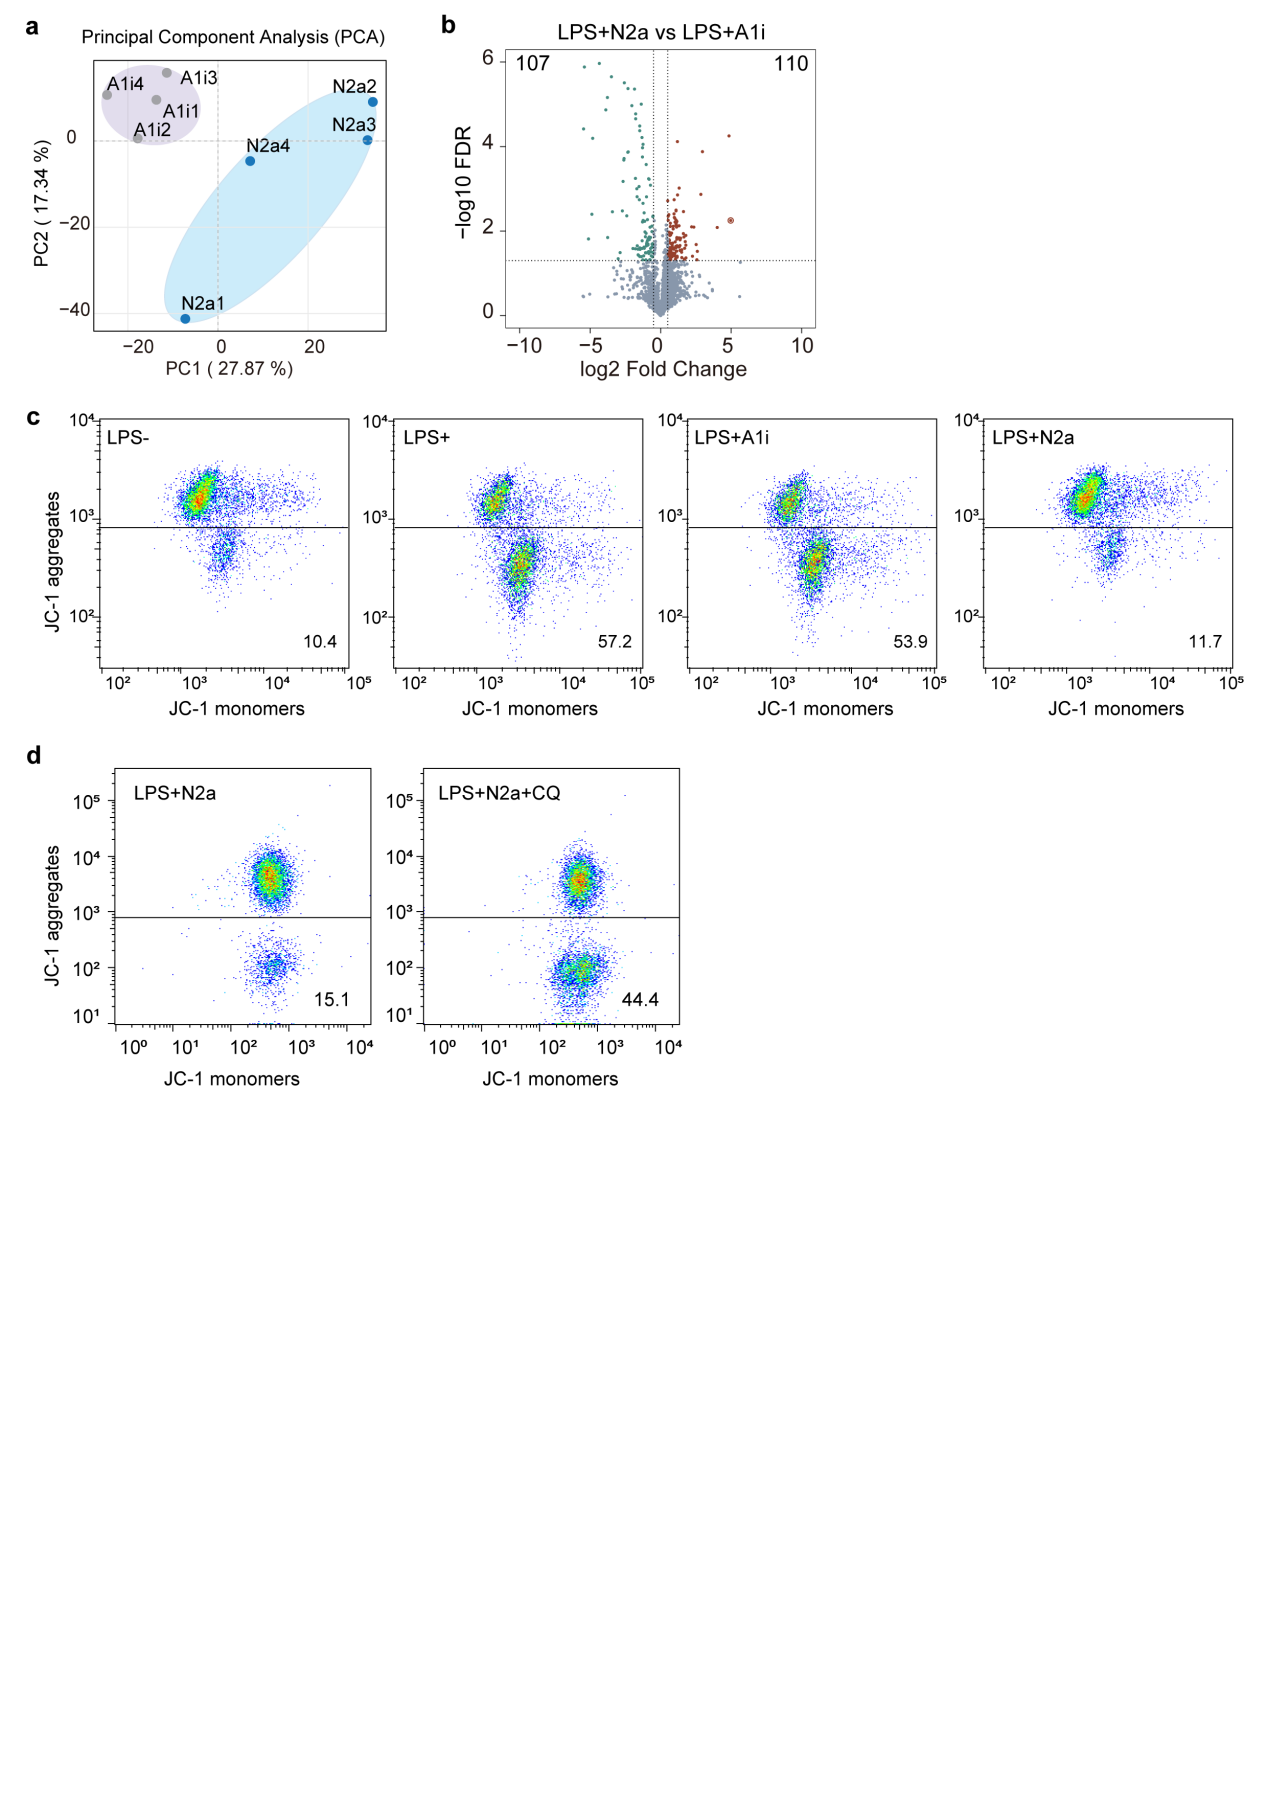


**Figure S3.** NRF2-Driven Lipophagy Restores Bioenergetics in Inflammatory Microglia, Related to Figure 4

(a) PCA of metabolomics data from BV2 cells treated with LPS+A1i (A1i) and LPS+N2a (N2a), showing distinct metabolic profiles between treatment groups.

(b) Volcano plot showing differentially abundant metabolites between LPS+N2a versus LPS+A1i groups.

(c) Flow cytometry analysis of JC-1 fluorescence showing the percentage of BV2 cells with high mitochondrial membrane potential (LPS-, LPS+, LPS+A1i, and LPS+N2a).

(d) Flow cytometry analysis of JC-1 fluorescence showing the percentage of BV2 cells with high mitochondrial membrane potential (LPS+N2a and LPS+N2a+CQ).

Figure S4


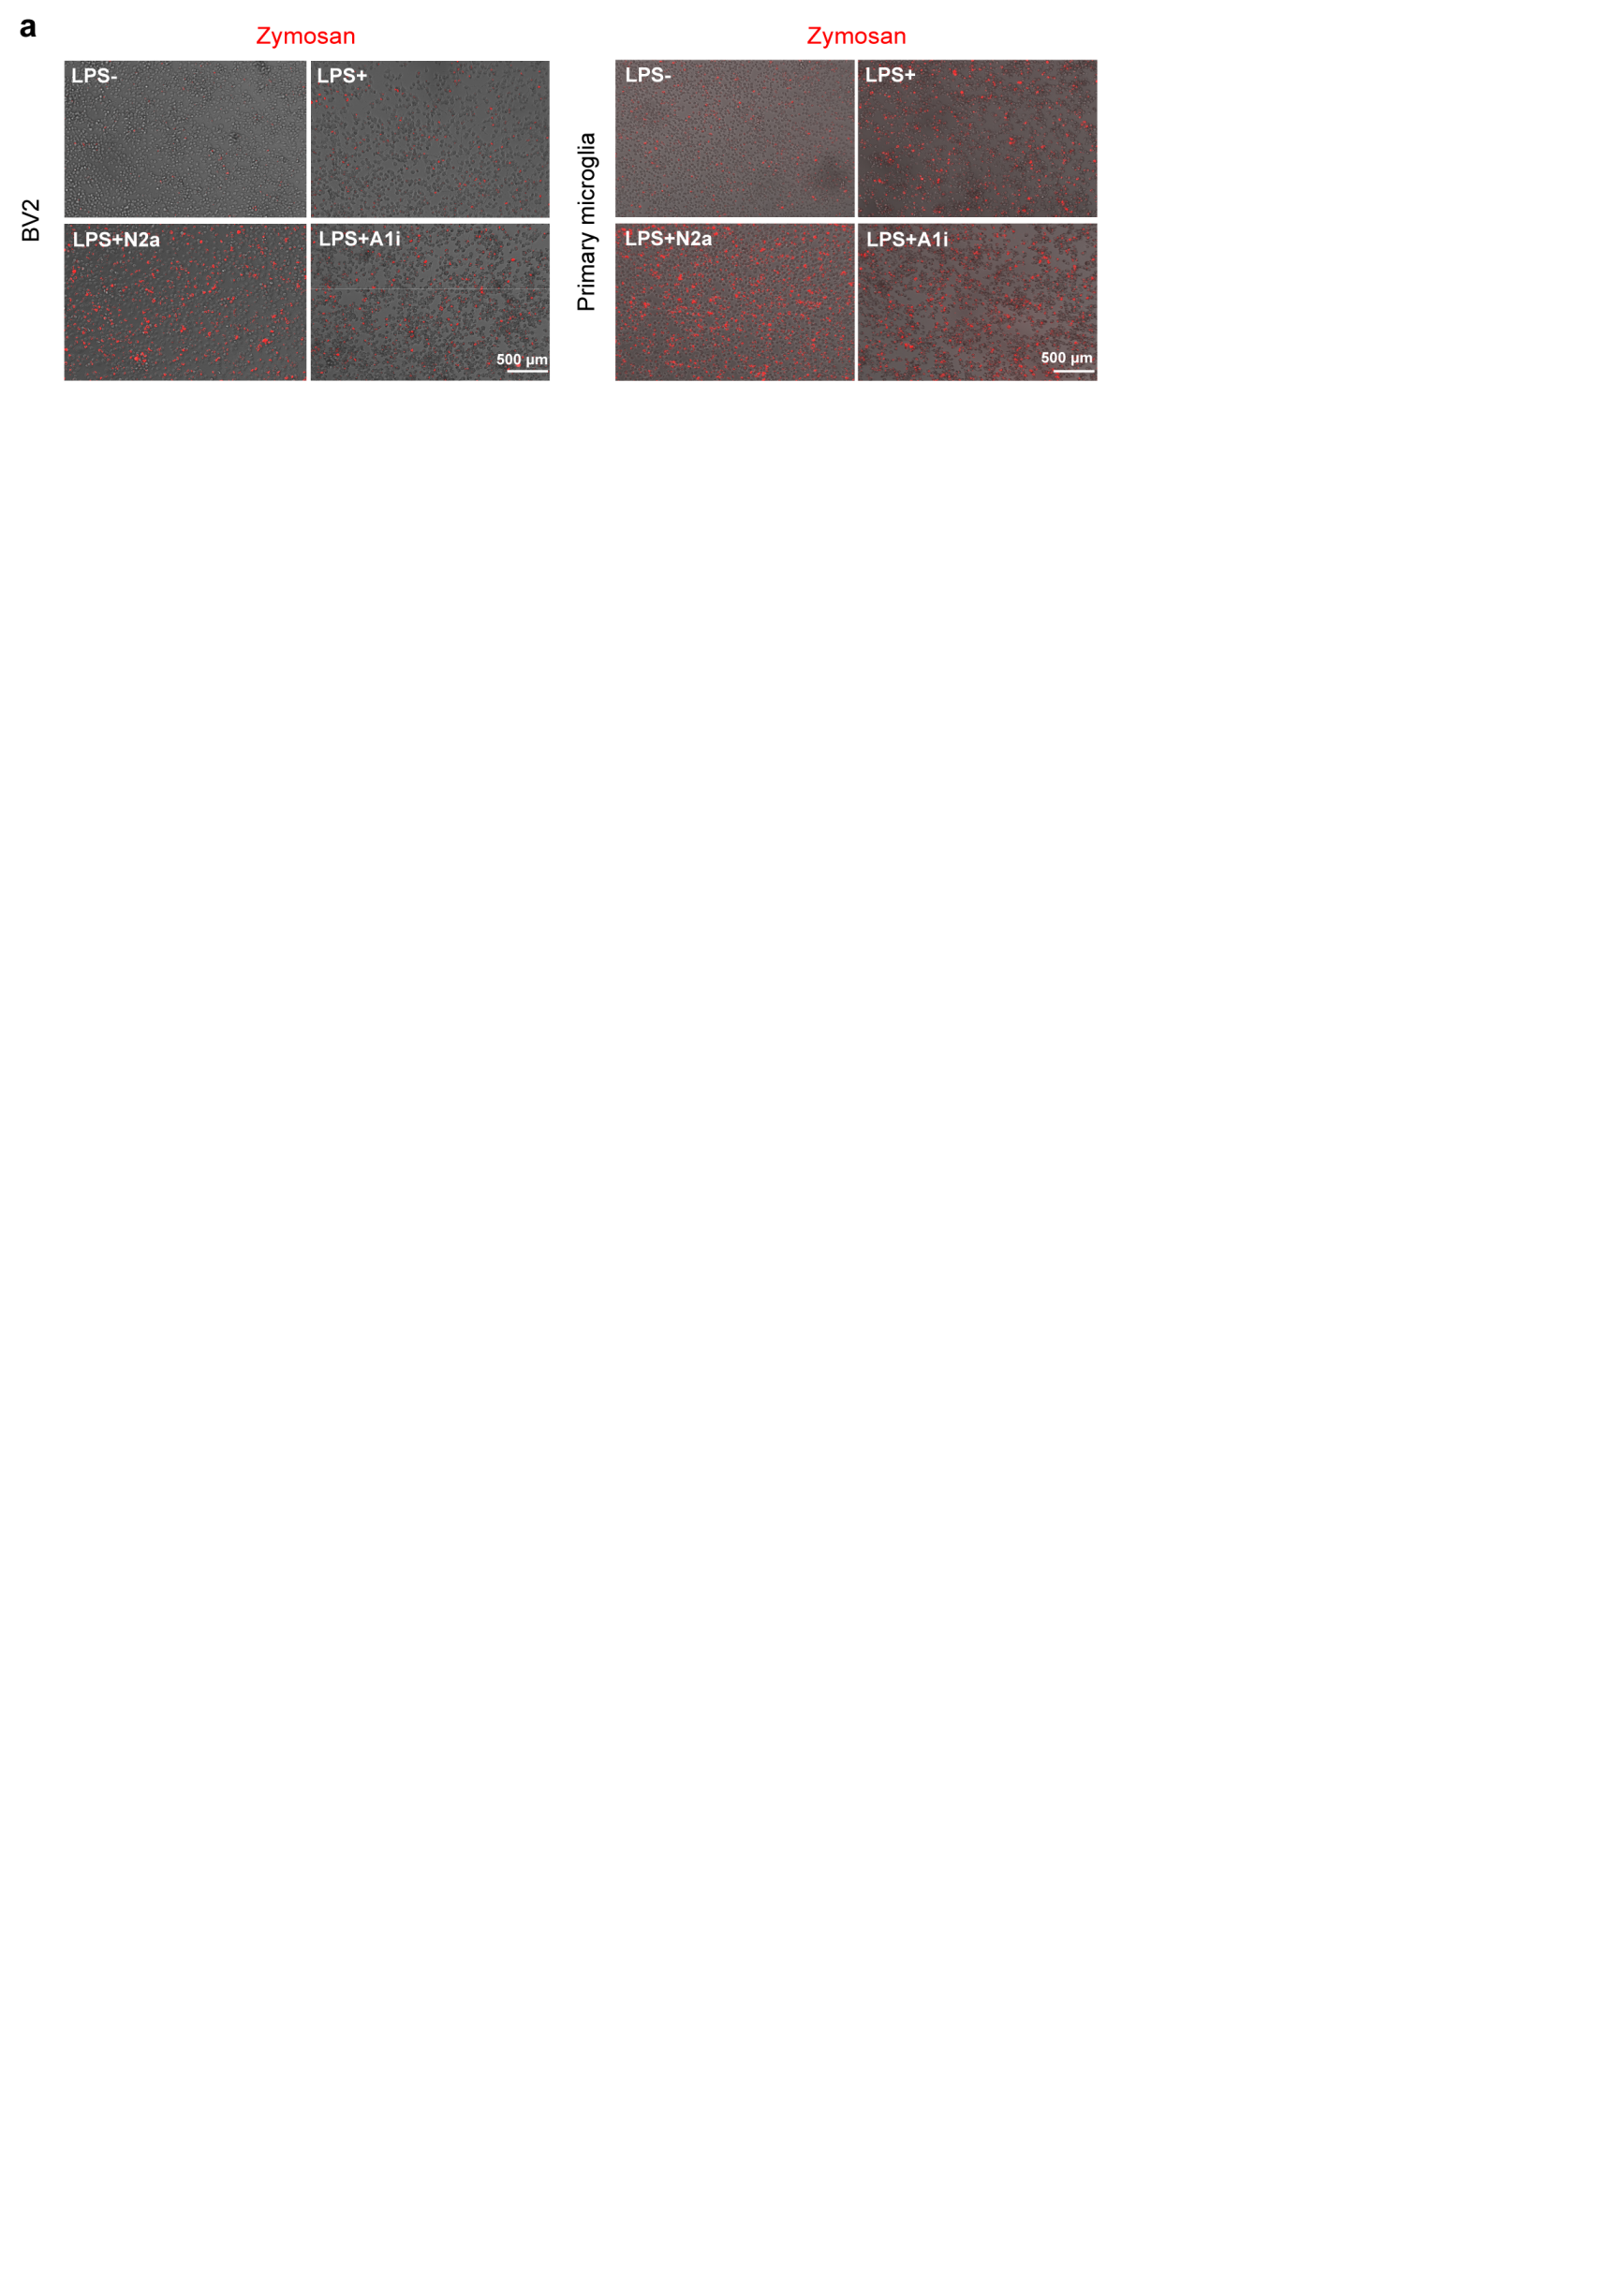


**Figure S4.** NRF2 Activation Promotes Microglial Phagocytosis Function, Related to Figure 5

(a) Representative brightfield and fluorescence overlay images of BV2 cells and primary microglia incubated with pH-sensitive fluorescent latex beads (red fluorescence upon lysosomal acidification). Scale bar, 500 μm.

Figure S5


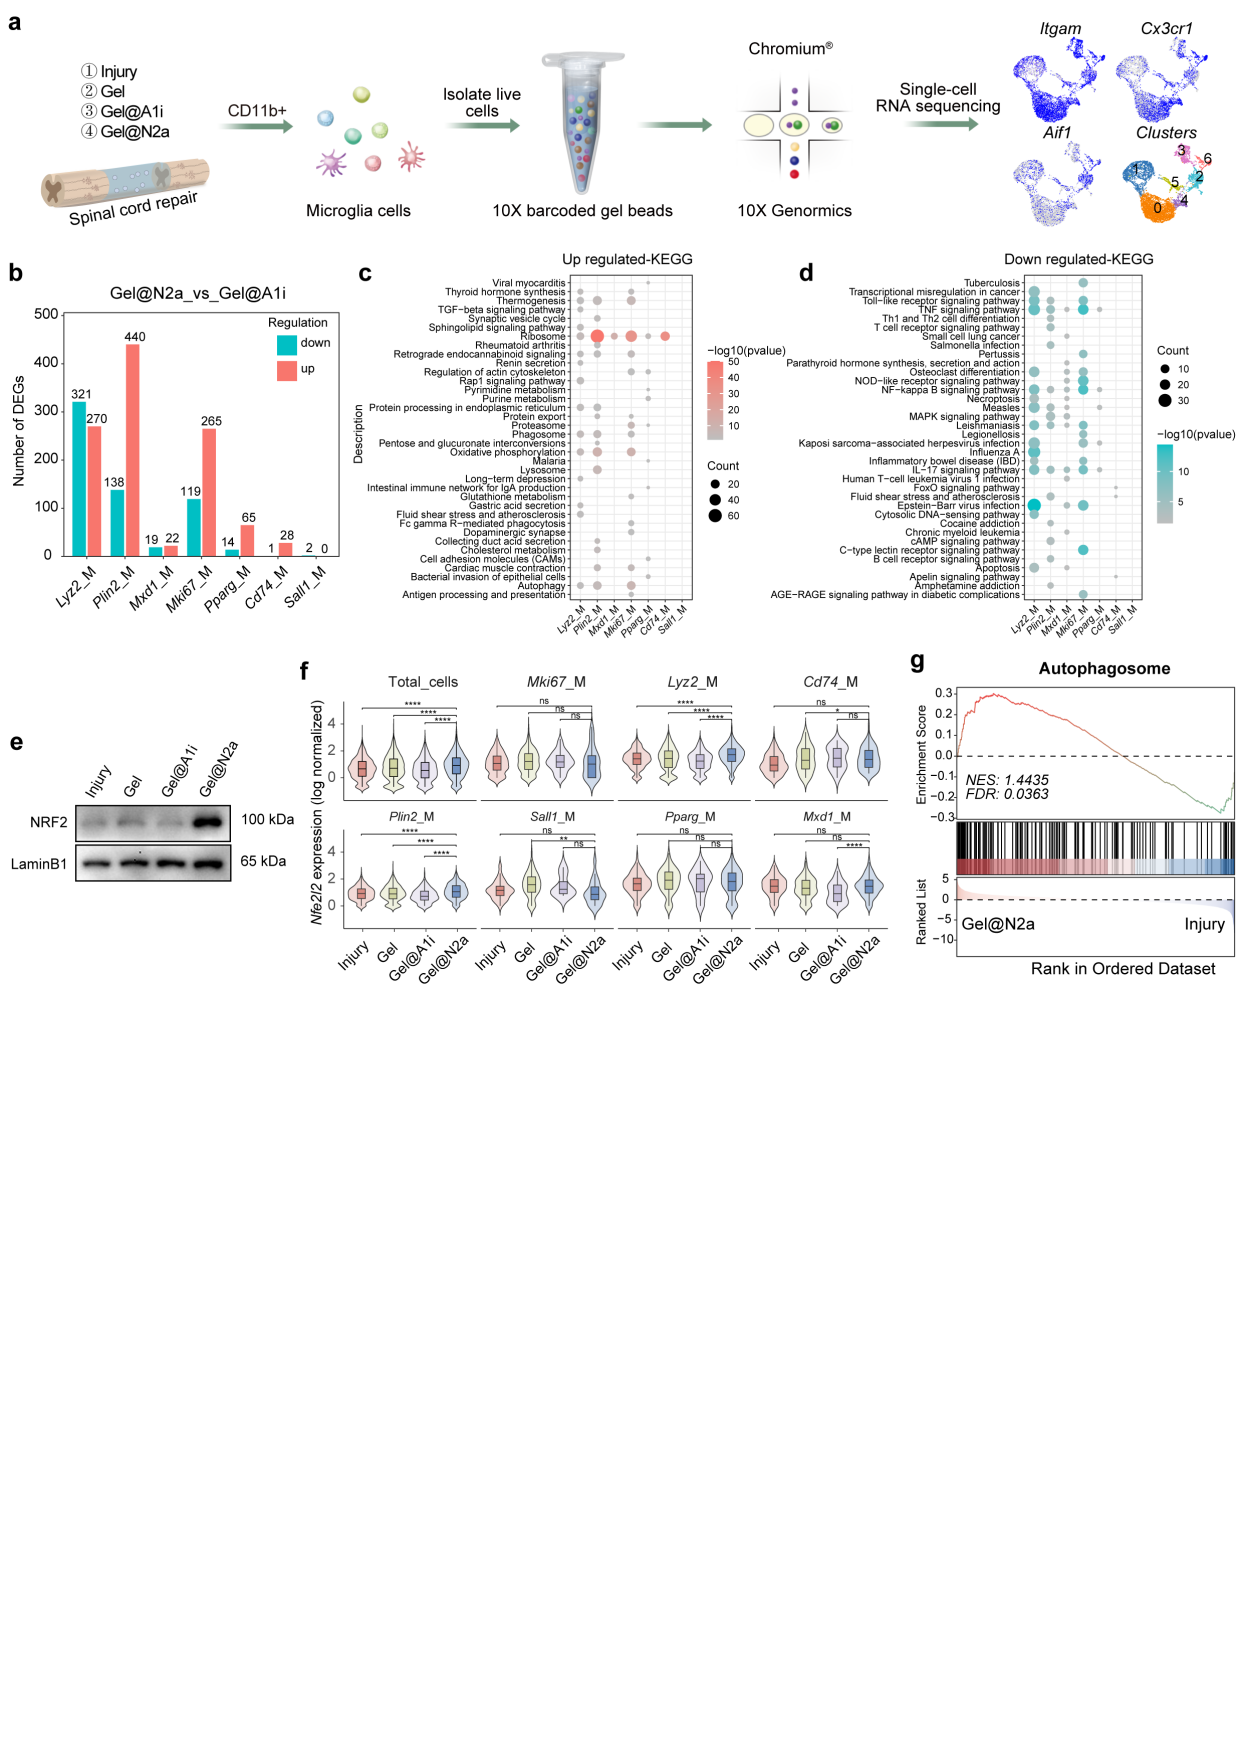


**Figure S5.** NRF2 Activation Promotes Microglial LD Turnover, Restores Microglial Bioenergetics, and Reduces Neuroinflammation in SCI Model, related to Figure 6 and Figure 7

(a) Schematic of the experimental workflow. Mice underwent spinal cord transection followed by implantation of collagen hydrogels loaded with DMF (Gel@N2a), Triacsin C (Gel@A1i) and blank hydrogel (Gel) at the lesion site. At 7 dpi, CD11b+ microglia were isolated from the lesion center via MACS and subjected to single-cell RNA sequencing using 10× Genomics.

(b) Number of DEGs between Gel@N2a and Gel@A1i treatments across indicated microglial subpopulations.

(c) KEGG pathway enrichment analysis of genes upregulated by Gel@N2a compared to Gel@A1i.

(d) KEGG pathway enrichment analysis of genes downregulated by Gel@N2a (conversely upregulated under Gel@A1i treatment).

(e) Western blot analysis of nuclear NRF2 protein levels in microglia from spinal cord lesion 7 days after treatment, with LaminB1 as nuclear loading control.

(f) Violin plots displaying normalized *Nfe2l2* (encoding NRF2) expression levels across total microglia (Total_cells) and distinct subpopulations (*Mki67+*, *Lyz2+*, *Cd74+*, *Plin2+*, *Sall1+*, *Pparg+*, and *Mxd1+*).

(g) GSEA plot showing differential enrichment of autophagosome pathway between Gel@N2a and Injury groups.

Data was analyzed by Wilcoxon rank-sum test (f). **p* < 0.05, ***p* < 0.01, *****p* < 0.0001. ns, not significant.
